# Supplementary material for: Plasma-Polymerised Antibacterial Coating of Ovine Tendon Collagen Type I (OTC) Crosslinked with Genipin (GNP) and Dehydrothermal-Crosslinked (DHT) as a Cutaneous Substitute for Wound Healing
Source: MDPI journal article supplement (doi:10.3390/ma16072739), 2023-03-29
Supplement: s1 [file s1]

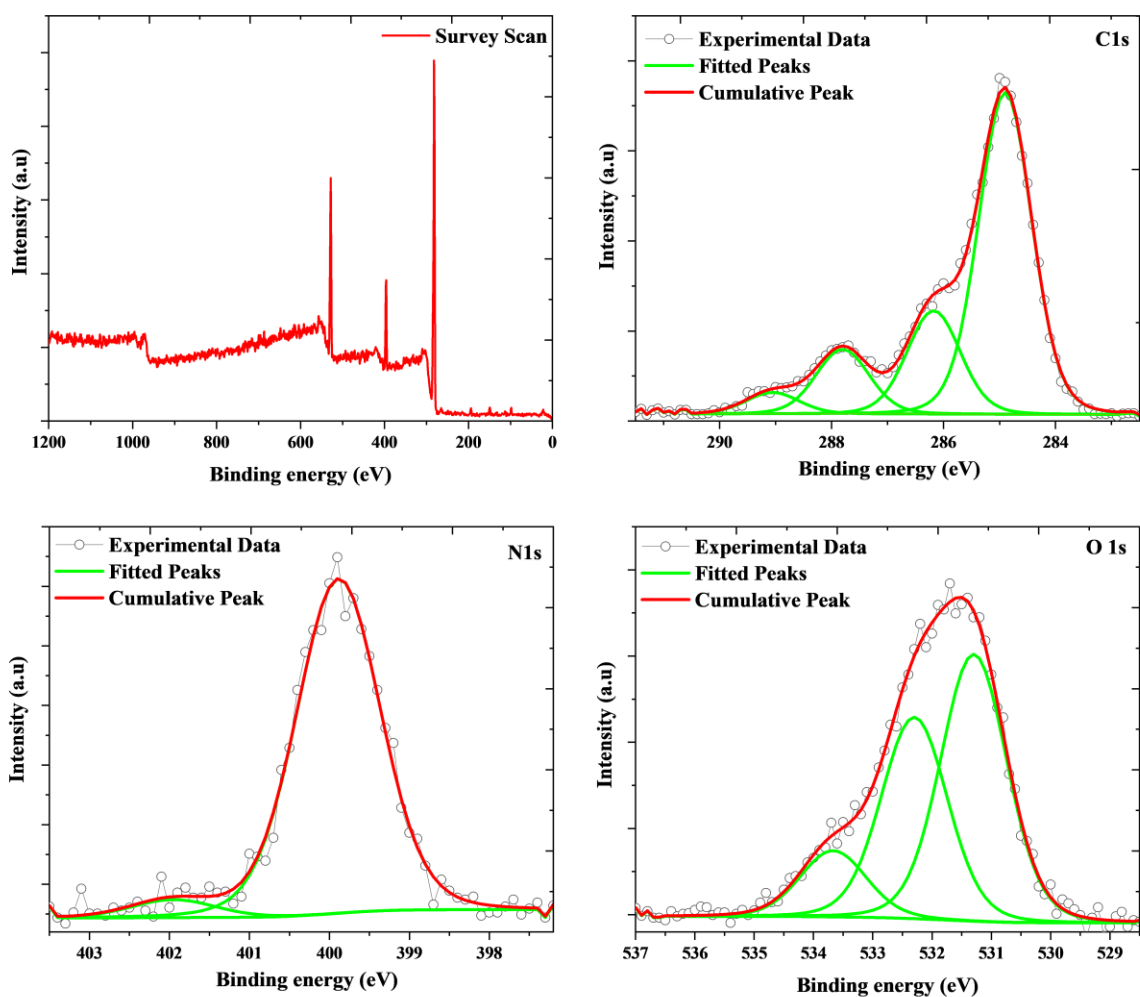

Figure S1. Survey scan and wide scan of GNP crosslinked without carvone. Component-fitted Carbon (C1s), Nitrogen (N1s), and oxygen (O1s) spectra.

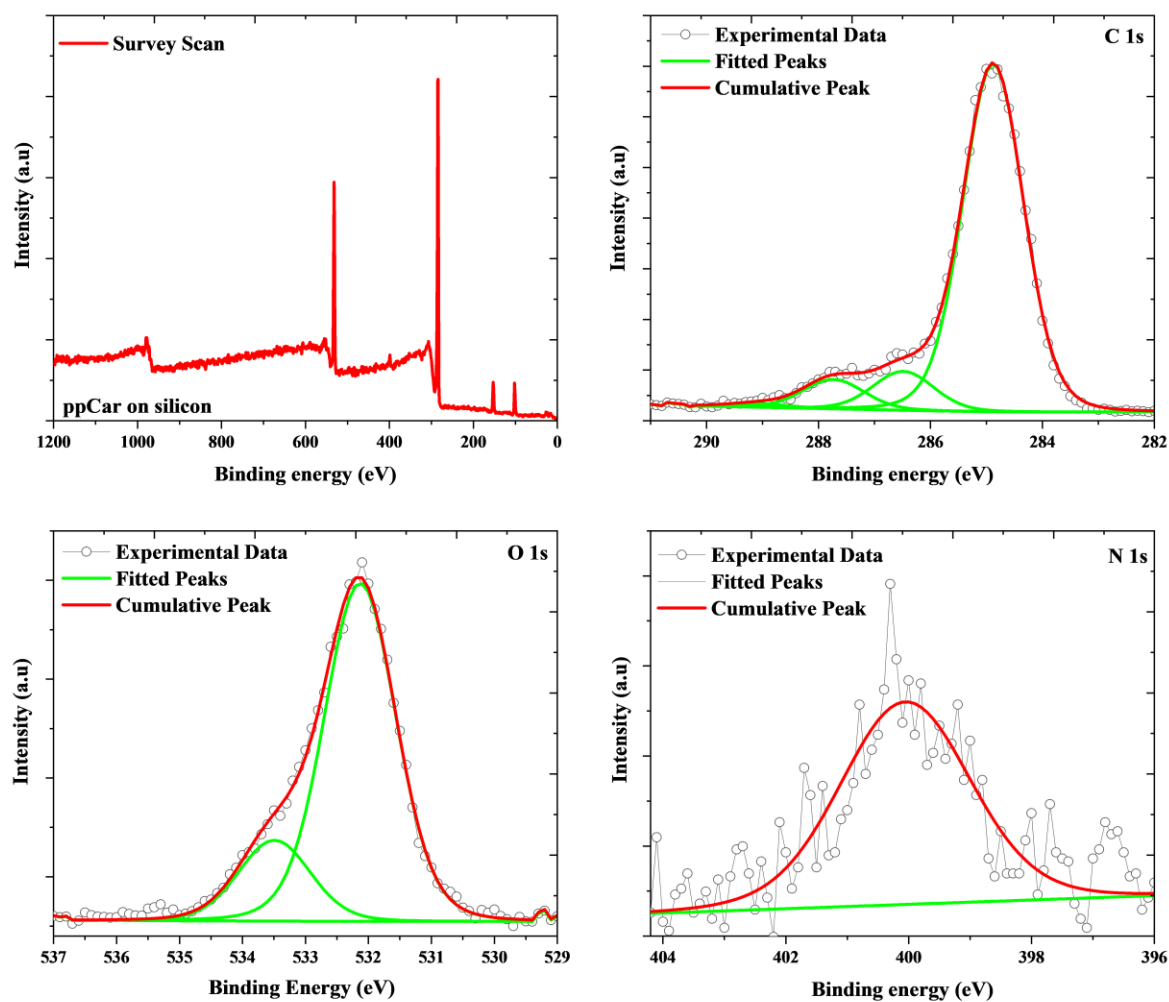

Figure S2. Survey scan and wide scan of thin film silicon with ppCar. Component-fitted carbon (C1s), oxygen (O1s), and nitrogen (N1s) spectra.

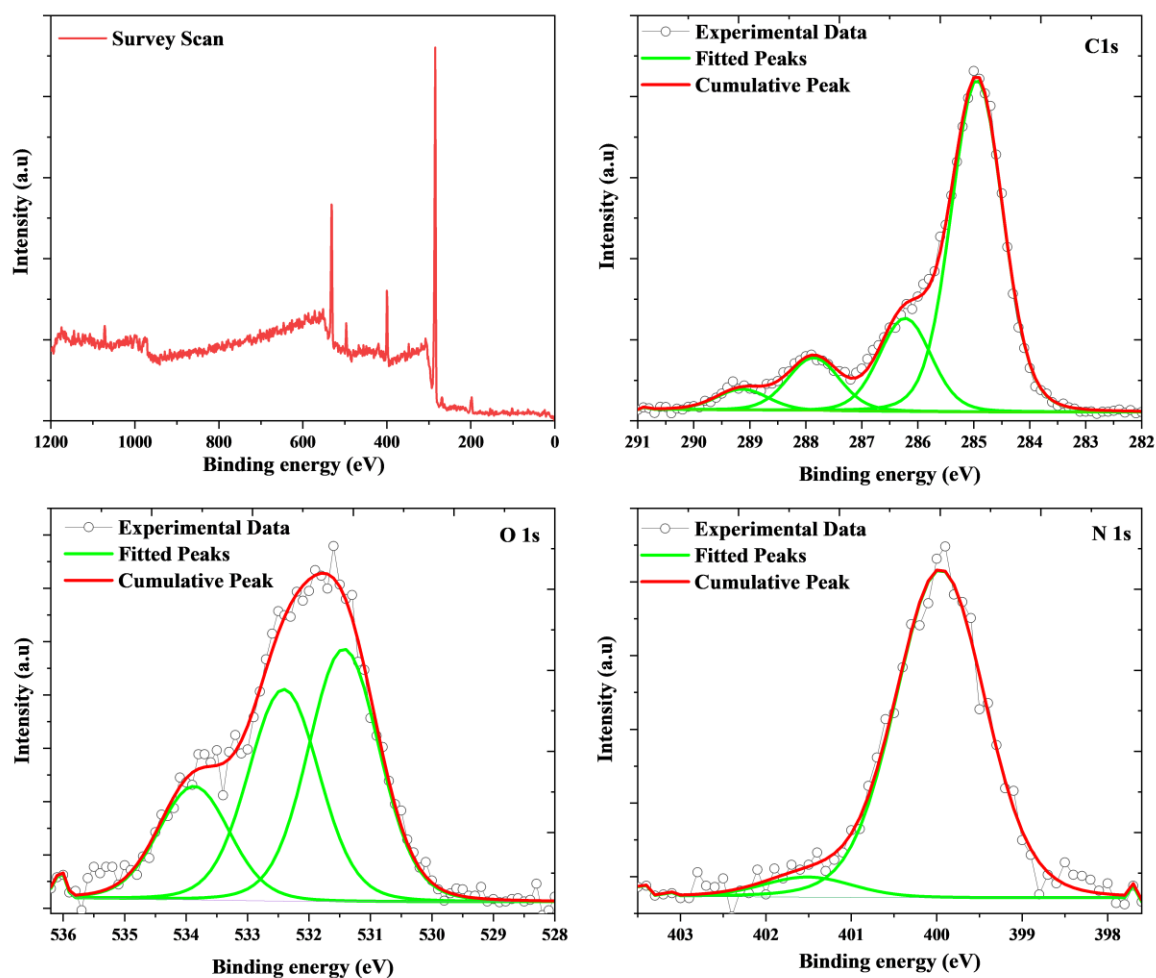

Figure S3. Survey scan and wide scan of OTC non-crosslinked without carvone. Component-fitted carbon (C1s), oxygen (O1s), and nitrogen (N1s) spectra.
